# Supplementary material
Source: PubMed Central journal article supplement (PMC8515992)
Supplement: boe-12-9-5614-s001.pdf [file boe-12-9-5614-s001.pdf]

## Expansion tomography for large volume tissue imaging with nanoscale resolution: supplement

**RUIXI CHEN,<sup>1,2</sup> XIAOFENG CHENG,<sup>1,2</sup> YONGSHENG ZHANG,<sup>1,2</sup>  
XIONG YANG,<sup>1,2</sup> YU WANG,<sup>1,2</sup> XIULI LIU,<sup>1,2,3</sup> AND SHAOQUN  
ZENG<sup>1,2,4</sup>**

<sup>1</sup>*Britton Chance Center for Biomedical Photonics, Wuhan National Laboratory for Optoelectronics  
Huazhong University of Science and Technology, Wuhan 430074, China*

<sup>2</sup>*MoE Key Laboratory for Biomedical Photonics, Collaborative Innovation Center for Biomedical  
Engineering, School of Engineering Sciences, Huazhong University of Science and Technology, Wuhan  
430074, China*

<sup>3</sup>*xlliu@hust.edu.cn*

<sup>4</sup>*sqzeng@mail.hust.edu.cn*

---

This supplement published with The Optical Society on 13 August 2021 by The Authors under the terms of the [Creative Commons Attribution 4.0 License](https://creativecommons.org/licenses/by/4.0/) in the format provided by the authors and unedited. Further distribution of this work must maintain attribution to the author(s) and the published article's title, journal citation, and DOI.

Supplement DOI: <https://doi.org/10.6084/m9.figshare.15123999>

Parent Article DOI: <https://doi.org/10.1364/BOE.431696>

# Expansion tomography for large volume tissues imaging with nanoscale resolution: supplemental document

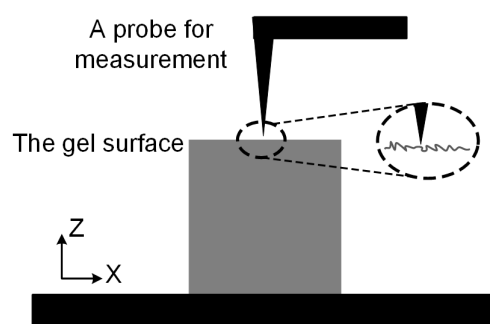

**Fig. S1** Scheme of testing the sectioning surface flatness

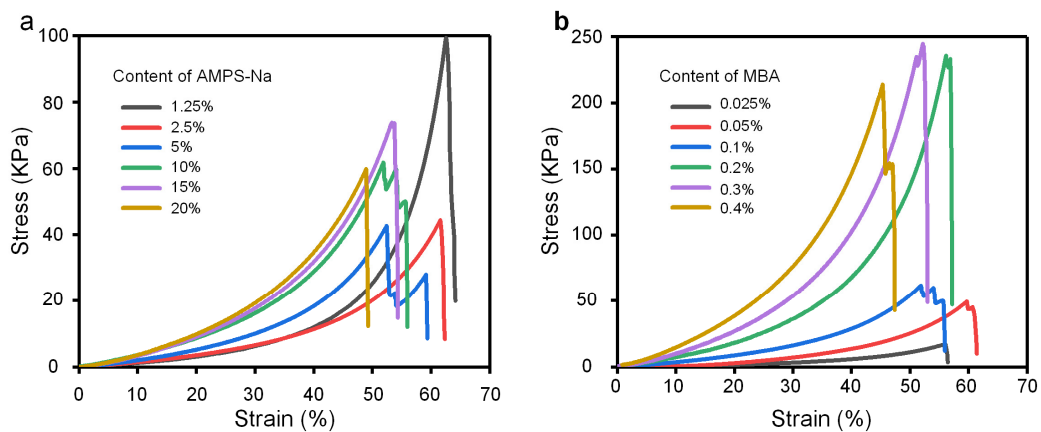

**Fig. S2** The stress-strain curves of ExT hydrogels under compress test. (a) The stress-strain curves of ExT hydrogels with different concentration of AMPS-Na. (b) The stress-strain curves of ExT hydrogels with different concentration of MBA.

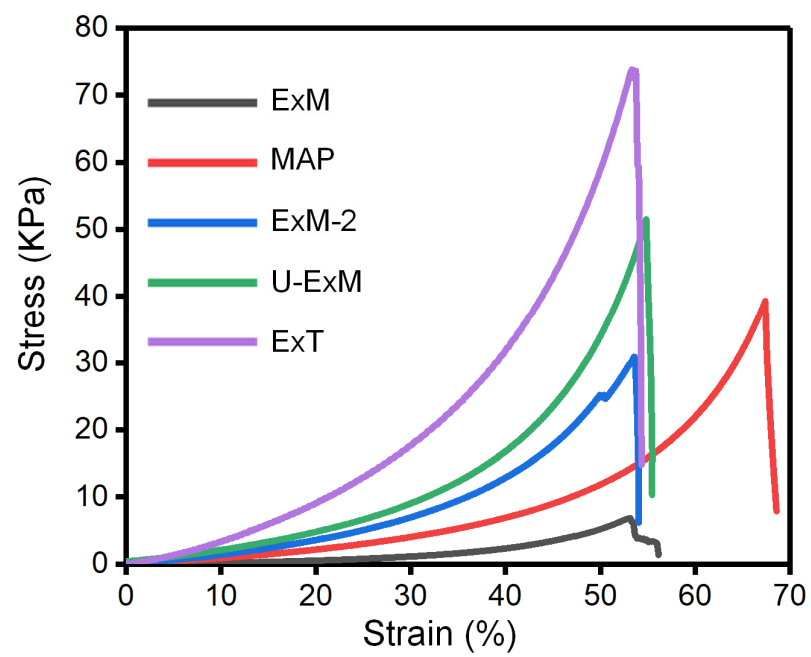

**Fig. S3** Stress-strain curves for different expansion gel recipes presented in Fig. 2e.

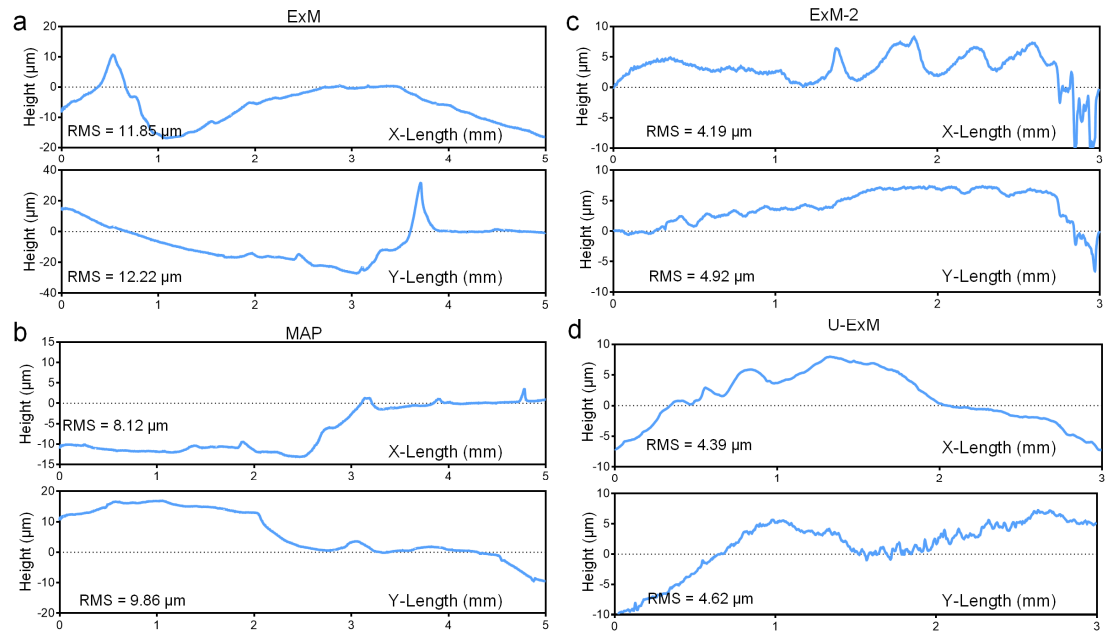

**Fig.S4** Measurements of surface evenness of various hydrogel after continuous sectioning with a vibratome. X is the direction of sectioning and Y is perpendicular to the direction of sectioning.

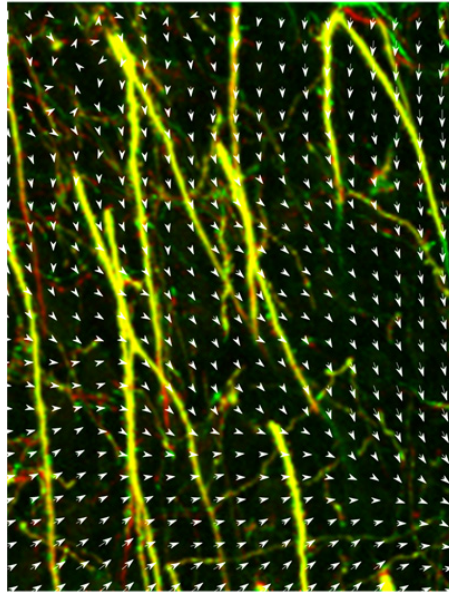

**Fig. S5** Overlay of pre-expansion image (green) and post-expansion image (red) after alignment of the post-expansion image using similarity registration. Related to Fig. 2a.

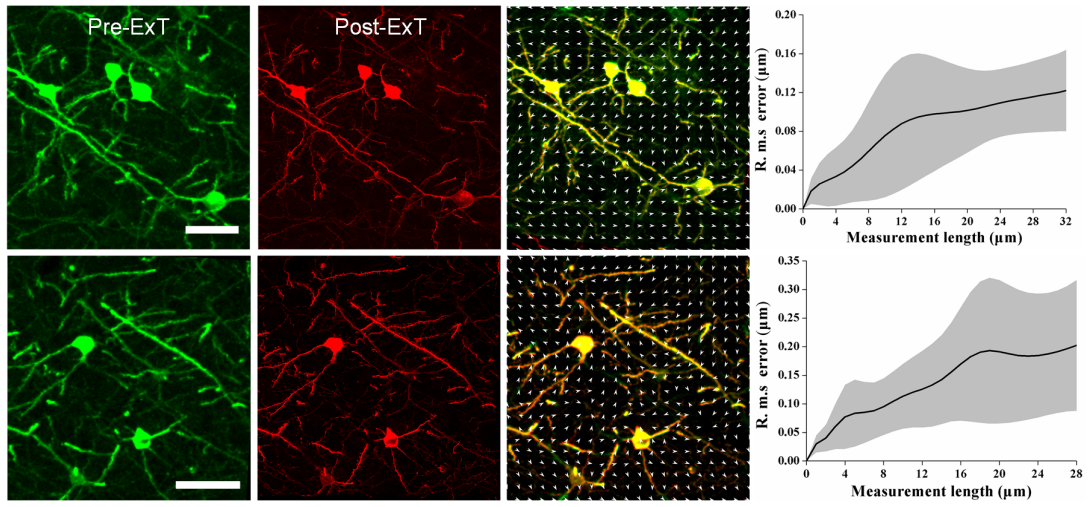

**Fig S6.** Overlay of pre-expansion image (green) and post-expansion image (red) after alignment of the post-expansion image using similarity registration. Arrows indicate deformation vectors to align the post-expansion image to the pre-expansion image. Scale bar: 50  $\mu\text{m}$

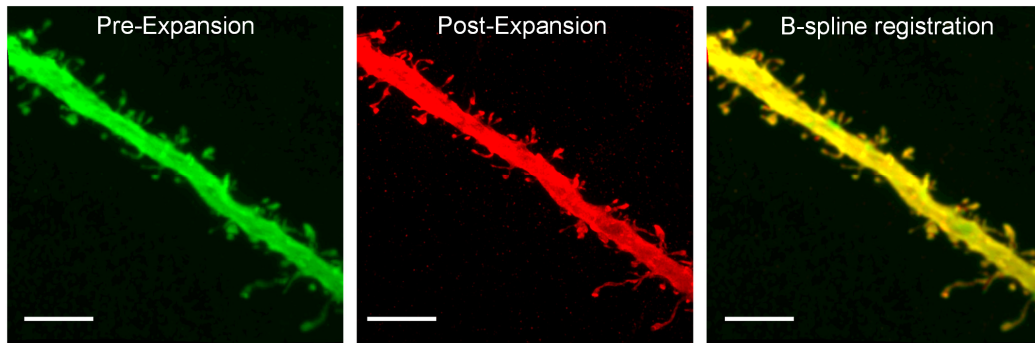

**Fig S7.** Overlay of pre-expansion image (green) and post-expansion image (red) after alignment of the post-expansion image using similarity registration. The image was obtained at a magnification of 63 $\times$ oil immersion objective, NA=1.46. Scale bar: 5  $\mu$ m

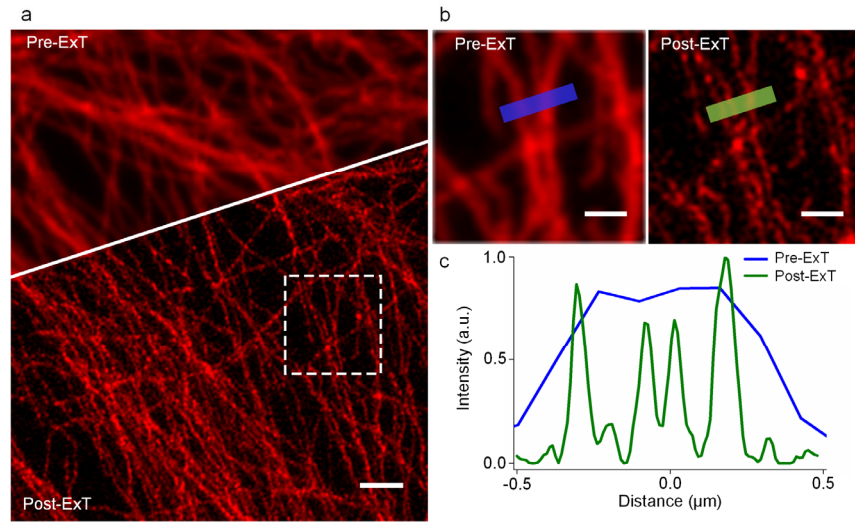

**Fig. S8** U2OS cell immunostained for tubulin and partially overlaid with corresponding pre-expansion image (top). The specimen was treated with expansion protocol.  $F=4.47$ . (b) Zoomed-in view of boxed region in a showing corresponding pre-expansion and post-expansion. (c) images of tubulin signal along with corresponding (b) line profiles.

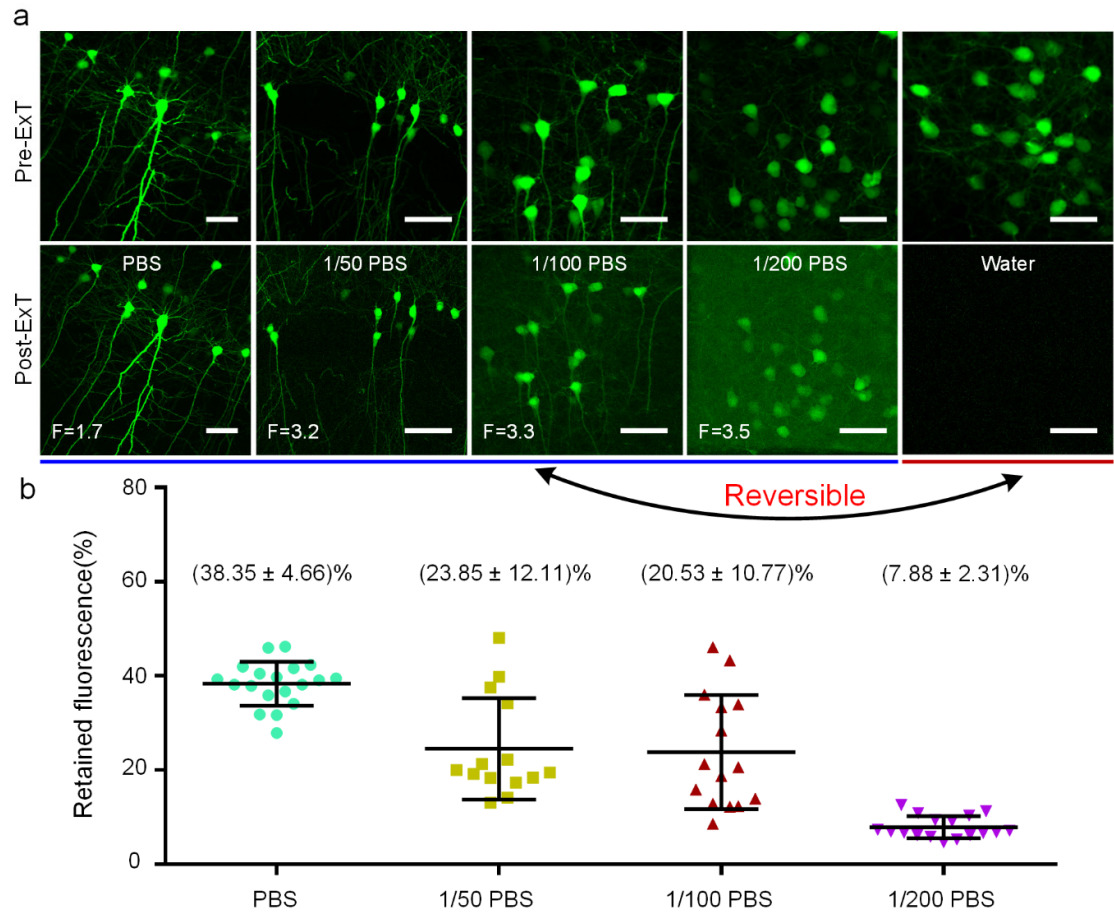

**Fig. S9** Fluorescence changes of GFP samples after expansion with ExT hydrogel. (a) The top row shows images of GFP brain slices pre-expansion. The bottom row shows images of GFP brain slices after ExT hydrogel treatment and then expansion in different concentration of PBS solution and DI water. (1/50 PBS means a 50-fold dilution of the 1×PBS solution. Similarly, 1/100 PBS means a 100-fold dilution of the 1×PBS solution; 1/200 PBS means a 200-fold dilution of the 1×PBS solution). (b) Fluorescence persistence of GFP protein after expansion in various concentration of PBS(mean  $\pm$  s.d.,  $n = 30$  somas from four brain slices). Scale bar: 50  $\mu$ m.

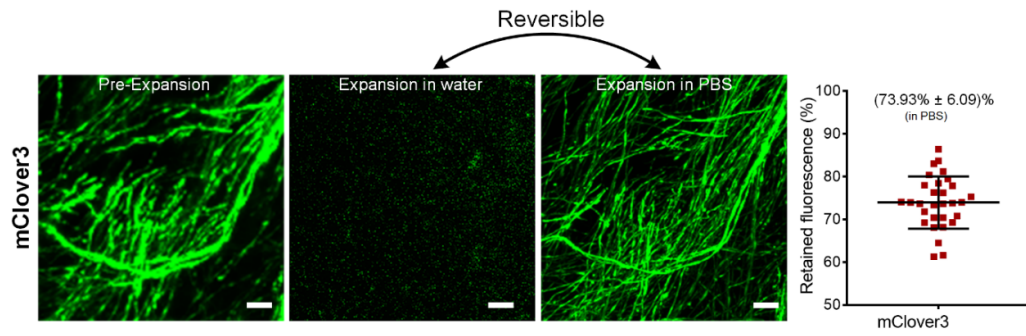

**Fig. S10** Fluorescence changes of mClover3 samples after expansion in DI water and PBS. The fluorescence persistence of mClover3 protein expanded in PBS is  $(73.93 \pm 6.09)\%$  (mean  $\pm$  s.d.,  $n = 30$  somas from four brain slices). Scale bar: 20  $\mu\text{m}$ .

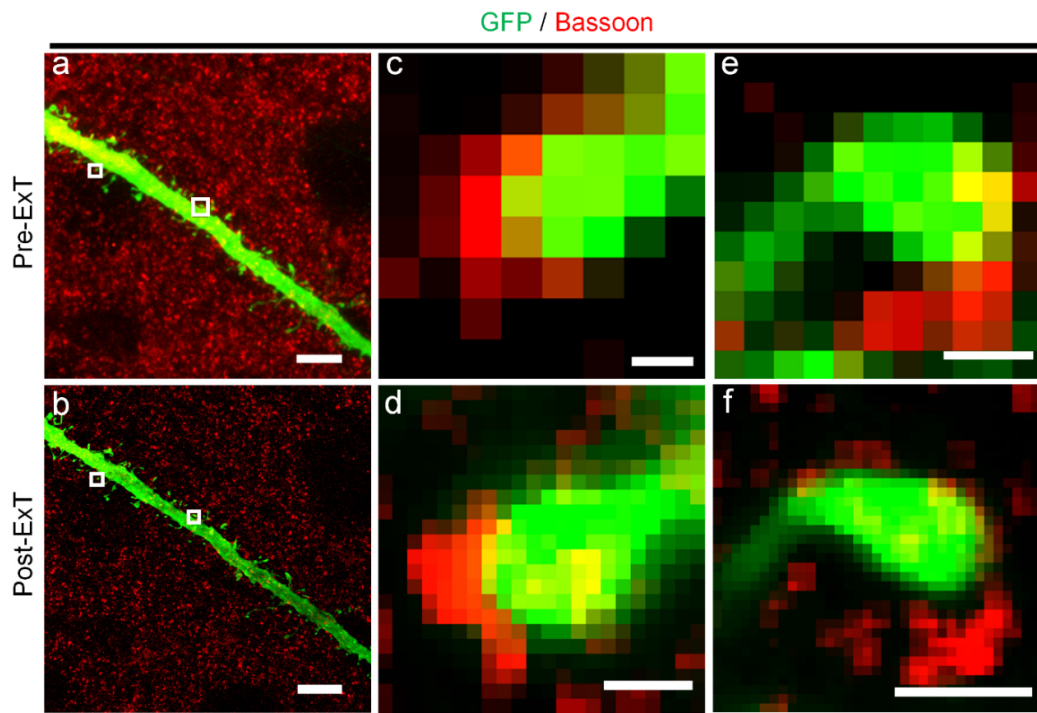

**Fig. S11** Image of GFP (dendritic spines) and presynaptic marker bassoon. (a) pre-ExT, (b) post-ExT. (c, e) Enlargements of insets (white boxes) from (a). (d, f) Enlargements of insets (white boxes) from (b). Scale bar: (a)-(b) 5  $\mu$ m, (c)-(d) 200 nm, (e)-(f) 500 nm.

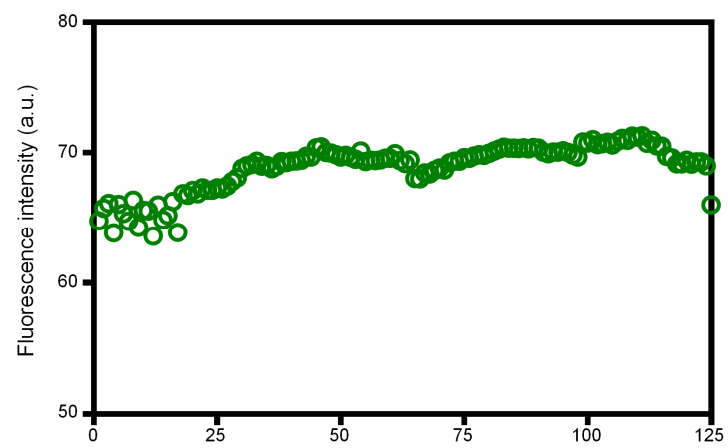

**Fig. S12** Fluorescence intensity distribution in 50- $\mu\text{m}$  slices.

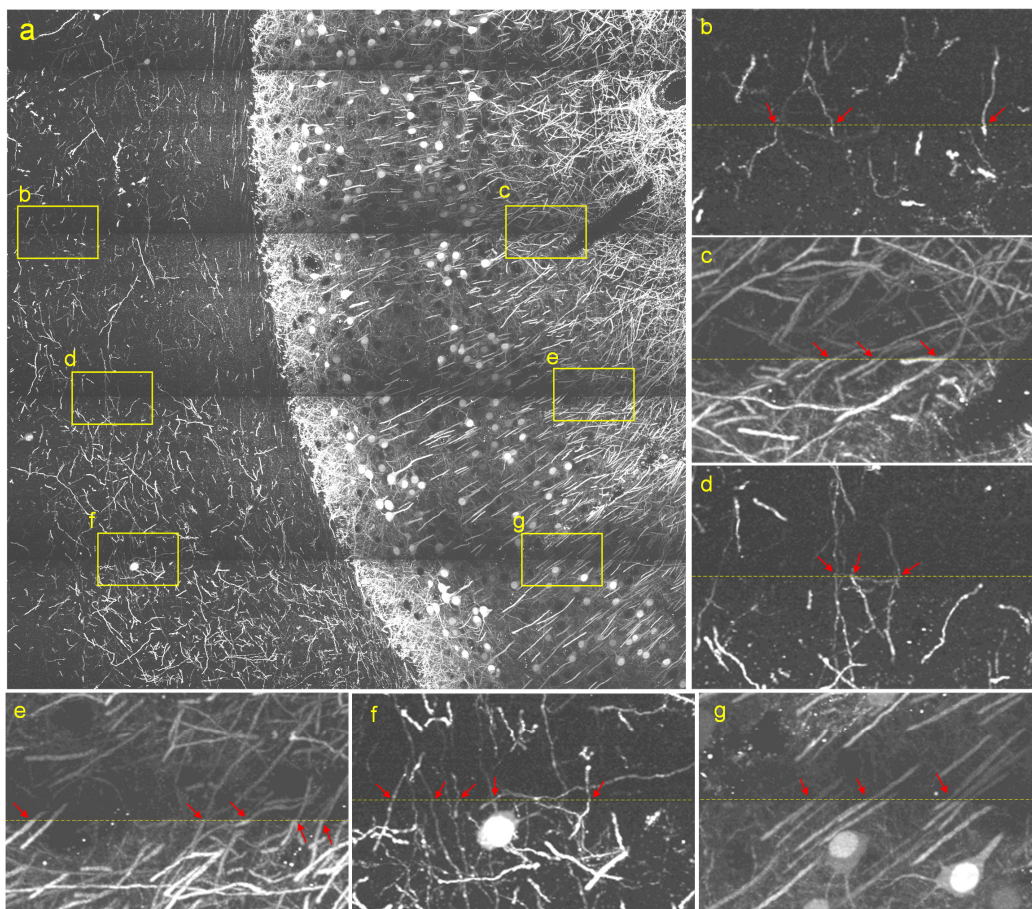

**Fig. S13.** The demonstration of continuous nerve fibers across the stitch. (a) A raw image of a layer that included multiple stitches.(b-g) Zoomed-in views of boxed regions in (a). Six stitches regions were selected as representatives to demonstrate the continuity of nerve fibers. The yellow dotted lines represent stitches, and red arrows represent locations of nerve fibers across the stitches.

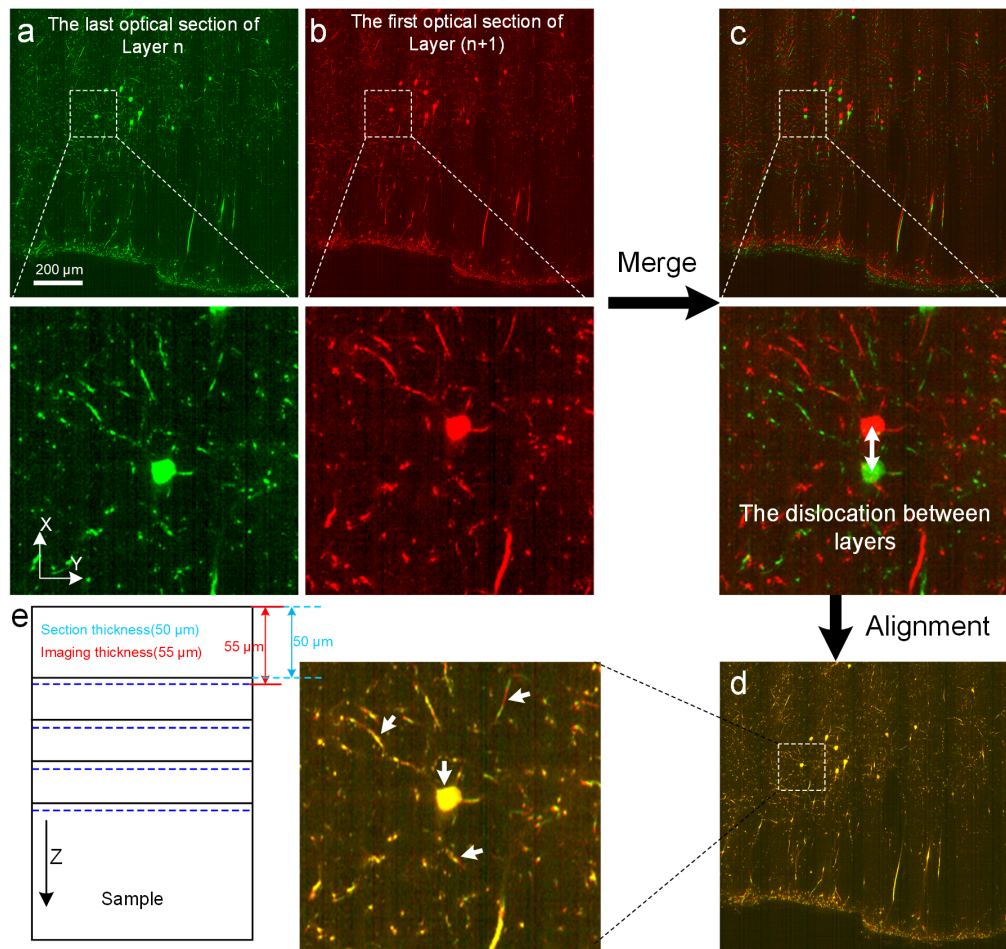

**Figure S14** Layer-to-layer misalignment (a, b and c) and alignment correction (d) in sectioning imaging.

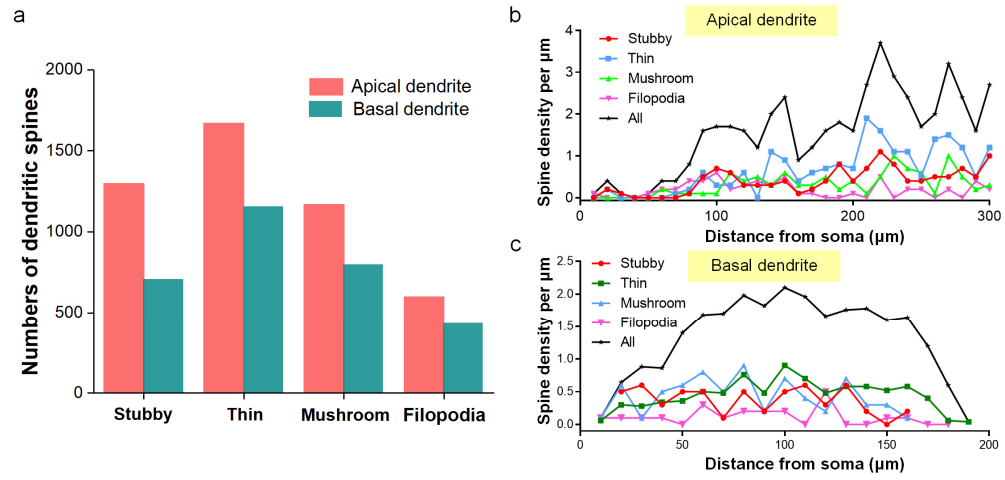

**Fig. S15** Dendritic spines statistics. (a) Statistics on the number of dendritic spines in different classifications. (b) Density statistics of dendritic spines of apical dendrites. (c) Dendritic spines density statistics of basal dendrites.

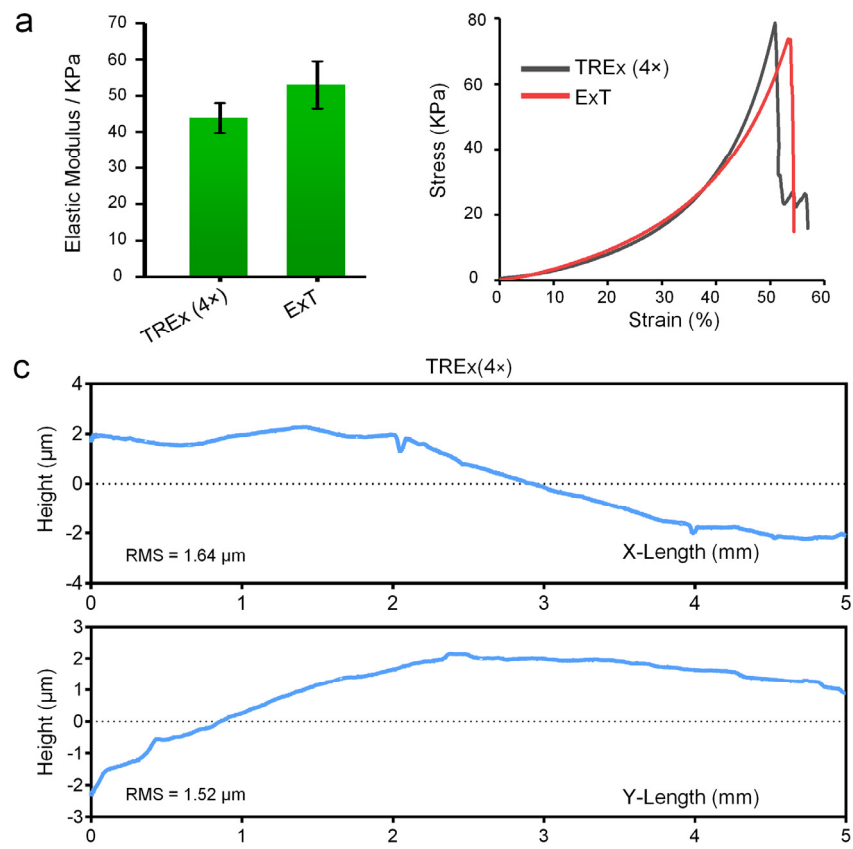

**Fig. S16** Measurements of the elastic modulus (a), the stress-strain curve (b) and surface flatness after-slicing of TREx (4 $\times$ ) gel [1].

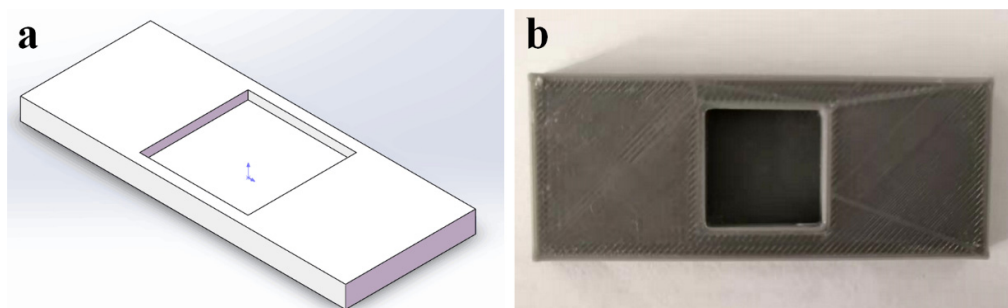

**Fig. S17** A mold for gel polymerization of brain blocks. (a) Schematic diagram of 3D printing. (b) 3D printed physical pictures. The height of the groove in the mold can be adjusted according to the size of the sample.

**Table S1.** Monomer solution recipe of ExT gel.

| AM<br>(wt%) | AMPS-Na<br>(wt%) | MBA (wt%) | Expansion Factor<br>(F) | Elastic Modulus (E,<br>kPa) | The integral area of<br>the curve |
|-------------|------------------|-----------|-------------------------|-----------------------------|-----------------------------------|
| <b>10</b>   | 1.25             | 0.1       | $2.71 \pm 0.05$         | $16.5 \pm 2.8$              | 1084.41                           |
|             | 2.5              |           | $3.23 \pm 0.08$         | $19.0 \pm 3.7$              | 696.12                            |
|             | 5                |           | $3.42 \pm 0.1$          | $28.0 \pm 3.5$              | 768.78                            |
|             | 10               |           | $4.19 \pm 0.21$         | $47.4 \pm 4.2$              | 1142.30                           |
|             | 15               |           | $4.23 \pm 0.22$         | $53.0 \pm 6.5$              | 1165.87                           |
|             | 20               |           | $4.20 \pm 0.19$         | $55.1 \pm 5.1$              | 909.96                            |
|             | 10               | 0.025     | $6.8 \pm 0.24$          | $9.4 \pm 3.6$               | 253.56                            |
|             |                  | 0.05      | $5.39 \pm 0.23$         | $19.3 \pm 3.8$              | 769.73                            |
|             |                  | 0.1       | $4.19 \pm 0.19$         | $47.4 \pm 4.2$              | 1142.30                           |
|             |                  | 0.2       | $3.31 \pm 0.13$         | $93.2 \pm 5.6$              | 3234.93                           |
|             |                  | 0.3       | $2.76 \pm 0.10$         | $152.2 \pm 7.1$             | 3524.72                           |
|             |                  | 0.4       | $0.83 \pm 0.09$         | $239.7 \pm 9.3$             | 3219.65                           |

**Table 2.** Performance of selected secondary antibody dyes in ExT gel.

| Dyes      | Host species     | E <sub>x</sub> max,<br>nm | E <sub>m</sub> max,<br>nm | Fluorescence<br>preservation<br>(%) | Source                | Catalog #   |
|-----------|------------------|---------------------------|---------------------------|-------------------------------------|-----------------------|-------------|
| Alexa 405 | Goat anti rabbit | 400                       | 419                       | 62.58 ± 5.82                        | Thermo Fisher         | A-31556     |
| Alexa 488 | Goat anti rabbit | 495                       | 519                       | 67.88 ± 6.02                        | Thermo Fisher         | A-11008     |
| CF 488    | Goat anti rabbit | 490                       | 515                       | 82.07 ± 6.60                        | Sigma-Aldrich         | SAB4600044  |
| Alexa 546 | Donkey anti goat | 556                       | 573                       | 96.92 ± 9.76                        | Thermo Fisher         | A-11056     |
| Alexa 568 | Goat anti mouse  | 578                       | 603                       | 84.91 ± 11.88                       | Thermo Fisher         | A-21124     |
| CF 568    | Goat anti rabbit | 562                       | 583                       | 91.78 ± 10.32                       | Sigma-Aldrich         | SAB4600084  |
| Alexa 594 | Goat anti rabbit | 590                       | 617                       | 76.62 ± 6.87                        | Thermo Fisher         | A-11012     |
| Cy 3      | Goat anti rabbit | 550                       | 570                       | 68.46 ± 5.46                        | Jackson<br>Laboratory | 111-165-003 |
| Cy 5      | Goat anti rabbit | 645                       | 664                       | 35.39 ± 3.37                        | Jackson<br>Laboratory | 111-175-144 |
| Alexa 647 | Donkey anti goat | 650                       | 665                       | 29.27 ± 4.10                        | Thermo Fisher         | A-21447     |

## References

1. H. Damstra, B. Mohar, M. Eddison, A. Akhmanova, L. Kapitein, and P. Tillberg, "Visualizing cellular and tissue ultrastructure using Ten-fold Robust Expansion Microscopy (TREx)," bioRxiv. doi:10.1101/2021.02.03.428837 (2021).
